# Supplementary material for: Utilization of Intraoperative TEE to Assess Supraventricular Tachycardia-Inducing Right-Sided Cardiac Compression by the Liver, Post-Liver-Transplantation Status
Source: Case Rep Transplant. 2015 Mar 12;2015:136595. doi: 10.1155/2015/136595 (PMC4377392; doi:10.1155/2015/136595)
Supplement: Supplementary file 1 — The supplemental digital material for this case report is contains four separate echocardiographic videos. Video 1 is a mid-esophageal five chamber view and the arrow delineates the lateral wall of the right atri-um. A mass of echogenic pattern consistent with hepatic tissue is visualized adjacent to, and compressing the right atrium. Video 2 is a mid-esophageal four chamber view that has been omniplaned to 70 degrees to better visualize the right atrium. Right atrial compression is evident. The next video (Video 3) is again the mid-esophageal five chamber view but it was acquired while the surgeons retracted the liver. It is evident that compression of right atrium is significantly improved by the surgical maneuver. Lastly, Video 4 is an apical four chamber transthoracic echocardiography loop that was captured post-plication. Compression of the right atrium and right ventricle is no longer present. Key: AV: Aortic Valve, LA: Left atrium, LV: Left Ventricle, RA: Right Atrium, RV: Right ventricle. TV: Tricuspid Valve. [file 136595.f1.zip]

Archive with 5 entries (4 files):
- 136595.f1/
- 136595.f1/Video 1 (5 chamb).wmv
- 136595.f1/Video 2 (Om 70).wmv
- 136595.f1/Video 3-Surg Retract.wmv
- 136595.f1/Video 4, Postplic TTE.wmv
